# Supplementary material for: Function of Host Protein Staufen1 in Rabies Virus Replication
Source: MDPI journal article supplement (doi:10.3390/v13081426), 2021-07-22
Supplement: s1 [file s1]

Figure S1. The effect of STAU1 overexpression on the replication on RABV.

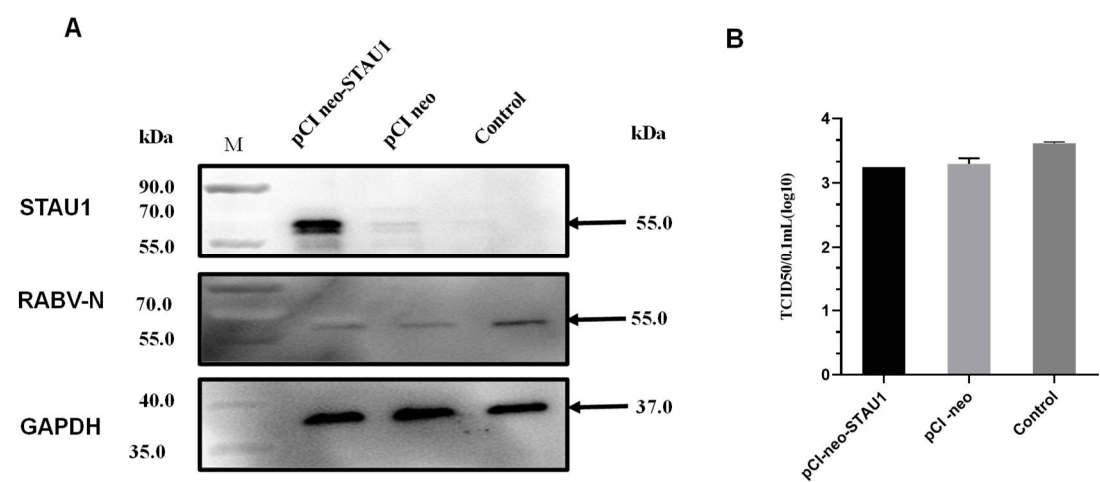

FigureS1. **(A)** Western blot confirmation of cells that overexpress STAU1 and were infected with RABV. **(B)** TCID<sub>50</sub> detection of RABV after cells upregulate STAU1.

Figure S2. Subcellular distribution of Negri body-like structures formed in RABV-infected LV-shRNA-iSTAU1/LV-shRNA-iC cells.

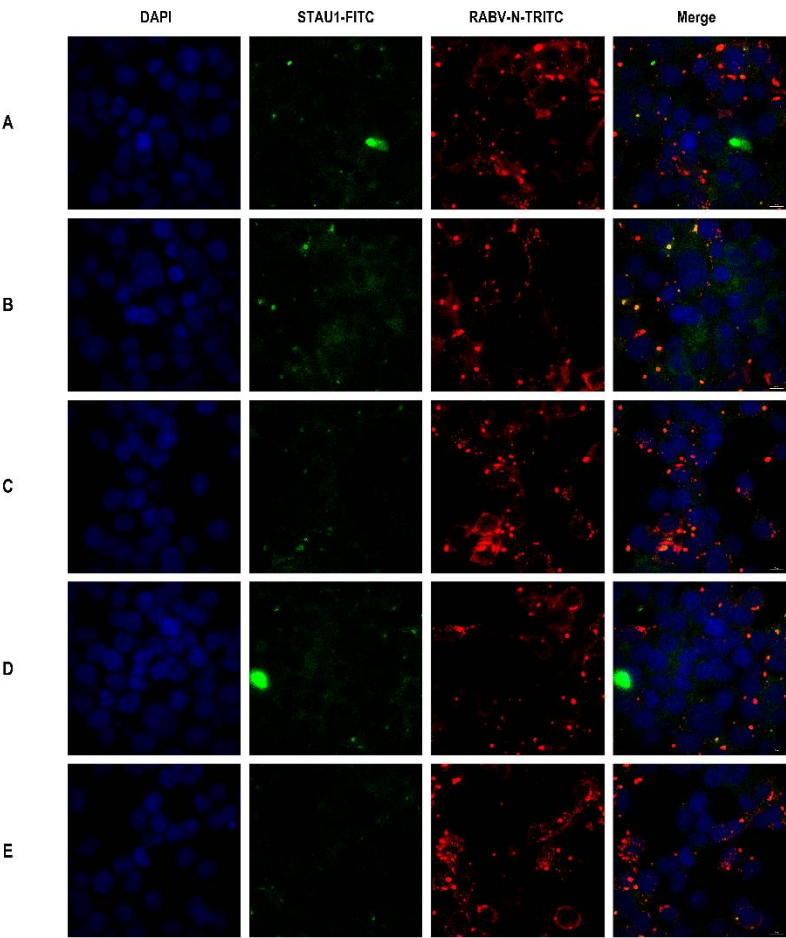

Figure S2A. Subcellular distribution of STAU1 in RABV-infected LV-shRNA-iSTAU1, Bars=10  $\mu$ m.

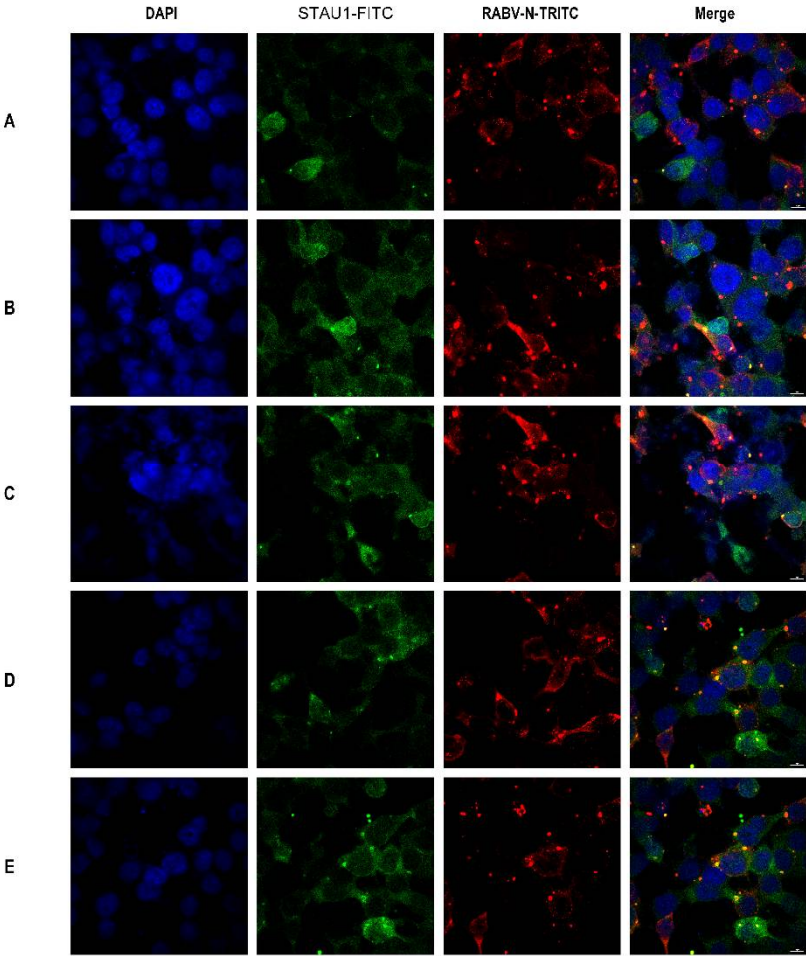

Figure S2B. Subcellular distribution of STAU1 in RABV-infected LV-shRNA-iC, Bars=10  $\mu$ m.
